# Supplementary material
Source: HighWire-hosted journal article supplement (https://ebmtp.com/highwire/filestream/136831/field_highwire_adjunct_files/0/bashir_1260.pdf)
Supplement: bashir_1260.pdf [file bashir_1260.pdf]

# 偏头痛与脑结构改变的关系

## 系统回顾及荟萃分析

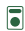

Asma Bashir, MD  
Richard B. Lipton, MD  
Sait Ashina, MD  
Messoud Ashina, MD,  
PhD

Correspondence to  
Dr. M. Ashina:  
ashina@dadlnet.dk

### 摘要

**目的：**探究有先兆偏头痛（migraine with aura,MA）及无先兆偏头痛（migraine without aura,MO）与患者 MRI 上所见三种脑组织结构异常的关系。这三种结构改变包括白质异常（white matter abnormality,WMA）、梗死样损害（infarct-like lesions,ILL）和灰质（gray matter,GM）及白质（white matter,WM）体积的改变。

**方法：**通过 PubMed 检索、追溯知名研究及综述的参考文献来初步筛选 2013 年以前可能与本试验目的相关的研究项目，进一步甄选之后对入选的研究进行分析并概括；最后分别计算 WMAs 和 ILLs 的整体风险比（odds ratios,OR）及 95% 置信区间（confidence intervals,CI）。

**结果：**本试验最终确认了 6 项人群研究以及 13 项临床研究；这些研究的结果提示，与对照组相比，偏头痛患者磁共振影像上更多见到白质异常、无症状梗死样损害和脑白质及灰质区域的体积改变，而有先兆的偏头痛与这三种改变相关性最好。荟萃分析提示 WMAs 与 MA 相关（OR 1.68；95% CI 1.07~2.65； $p = 0.03$ ；），而与 MO 无关（OR 1.34；95% CI 0.96~1.87； $p = 0.08$ ）；MA 与 MO 患者相比，前者与 ILLs 的相关性更强（OR 1.44；95% CI 1.02~2.03； $p = 0.04$ ）；而 MA 和 MO 分别与对照组相比，ILLs 的发生率没有统计学差异， $p$  值分别为 0.52 及 0.08。

**结论：**上述研究数据提示，偏头痛可能是造成脑组织结构改变的危险因素。未来仍需要更多纵向研究来确定偏头痛有无先兆对脑结构影响的差异，以更好地描述偏头痛发作频率对脑结构改变的影响，并且评价脑结构及功能影响的动态变化过程。

### 术语

ACC = 扣带回前部；CAMERA = 偏头痛患者脑改变的流行病危险因素分析；CI = 置信区间；DTI = 弥散张量成像；GM = 灰质；ICHD = 国际头痛疾病分类；IHL = 幕下高信号灶；ILL = 梗死样损害灶；MA = 有先兆偏头痛；OR = 比值比；PAG = 导水管周围灰质；VBM = 体素成像技术；WM = 白质；WMA = 白质异常。

偏头痛是神经系统常见病，表现为发作性单侧的搏动性疼痛并伴有自主神经功能异常。约 1/3 偏头痛患者有一过性神经系统症状，称为有先兆偏头痛（MA）<sup>[1]</sup>。偏头痛发病率约为 10%~15%，给个人及社会都造成了巨大的负担<sup>[2-4]</sup>。偏头痛及其他类型头痛的门诊患者占到神经科门诊量的 20%<sup>[5]</sup>。

以往的观点认为偏头痛为神经系统良性疾病，不会对脑组织造成长期损害。神经科医生对偏头痛患者行影像学检查通常是为了排除头痛的继发性因素。在这些影像资料中经常可以看到脑白质异常（white matter abnormality,WMA），也不难见到梗死样病灶（infarct-like lesions,ILL），这些检查发现会让患者及医师担忧<sup>[6]</sup>。最新的研究数据显示偏头痛是临床无症状性脑部病灶的危险因素，如 MRI 上检测到的 WMA<sup>[7-14]</sup>、ILL<sup>[10,13-16]</sup> 和脑灰、白质区域体积改变<sup>[17-24]</sup>。其病理基础及临床意义尚不清晰。报道称此类脑结构改变能够增加偏头痛发作频率，可能表现了脑结构异常的解剖学进展过程<sup>[10,25,26]</sup>。

通过总结 MA、无先兆偏头痛（migraine without aura,MO）与三种磁共振上脑结构改变（WMA、

补充数据见  
[www.neurology.org](http://www.neurology.org)

From the Danish Headache Center and Department of Neurology (A.B., M.A.), Glostrup Hospital, Faculty of Health and Medical Sciences, University of Copenhagen, Glostrup, Copenhagen, Denmark; Montefiore Headache Center (R.B.L.), Department of Neurology, Albert Einstein College of Medicine, Bronx; and Headache Program (S.A.), Department of Pain Medicine and Palliative Care, Department of Neurology, Albert Einstein College of Medicine, Beth Israel Medical Center, New York, NY.

Go to [Neurology.org](http://Neurology.org) for full disclosures. Funding information and disclosures deemed relevant by the authors, if any, are provided at the end of the article.

ILL 及体积改变) 关系的试验数据, 我们对上述 3 种影像学改变进行了荟萃分析, 其结果将为神经科医师解释这些临床上的异常发现提供一定的依据。

**方法 检索策略及入选标准。** 在 PubMed 上通过限定标题检索 1989 年~2013 年间发表的研究偏头痛患者磁共振改变的文章, 并进行筛选。检索关键字为“白质异常”、“梗死样损害”、“皮质改变”、“MRI”, 分别与“偏头痛”并列检索(图 1), 选取以人为研究对象的英文文献。我们也对相关原创文章及综述的参考文献进行追溯来搜罗研究项目以尽量减少漏查。通过浏览所有符合检索要求文章的内容、方法及研究设计进行甄选。入选的研究包括收集偏头痛组及对照组中 MRI 结构数据的对照研究、横断面研究以及队列研究。研究中偏头痛的诊断标准通过了仔细审查。大多数研究使用国际头痛疾病分类 (ICHD-I 和 ICHD-II) 来诊断 MA 及 MO, 只有一项研究使用了特异性较差的诊断标准<sup>[16]</sup>。该研究也被纳入我们的分析之中, 因为该研究对偏头痛的定义确切, 且不会影响到最终关系的判断。纳入了以下磁共振成像技术: T1 加权像、T2 加权像、FLAIR 像、弥散张量成像 (diffusion

tensor imaging, DTI) 及像素形态测量法 (voxel-based morphometry, VBM); 纳入 1.0T 至 3.0T 核磁共振, 排除 0.5T 核磁、功能性 MRI 及正电子发射断层扫描 (PET)。

**脑结构改变的定义及统计分析。** 关于脑结构改变的定义及统计分析 (荟萃分析) 试验详见在线补充文件 (附录 e-1 及 e-2, *Neurology*<sup>®</sup> 网址 [www.neurology.org](http://www.neurology.org))

**结果** 通过检索 PubMed 最终确定了 13 项临床研究及 6 项人群研究 (其中 4 项基于同一队列)。下面依次介绍不同类型结构改变的临床研究及人群研究结果 (见表 1~3 及表 e-1)。

**脑白质异常的研究。** 只有 4 项 WMA<sup>[7-9,12]</sup> 临床研究符合入选标准 (表 1)。4 项研究均探究了偏头痛与磁共振上所见的 WMA 的关系, 研究发现与对照组相比, 偏头痛患者 WMA 更常见。其中 2 项研究探讨了偏头痛相关因素 (如: 年龄、偏头痛类型、发作频率、持续时间) 与 WMA 的关系, 但并未发现他们之间存在任何关联<sup>[7,12]</sup>。

图 1 通过 Pubmed 检索关于偏头痛脑结构改变的研究 (1989~2013)

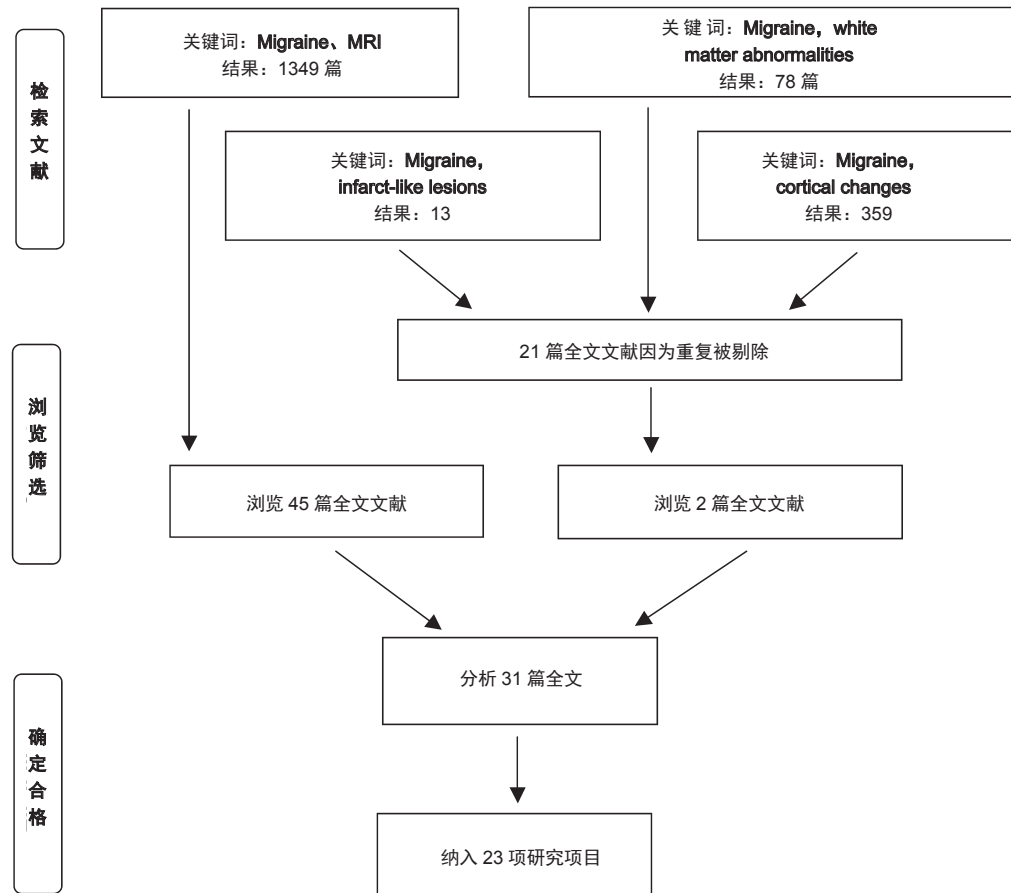

**表 1 关于脑白质异常的以临床为基础的研究**

| 作者                           | 影像             | WMA 患者数 (%)          |        |       | 偏头痛组与对照组的比例 (平均年龄, 岁); 与偏头痛相关的变量的可能相关性和 p 值                                                                                             |
|------------------------------|----------------|----------------------|--------|-------|-----------------------------------------------------------------------------------------------------------------------------------------|
|                              |                | MA                   | MO     |       |                                                                                                                                         |
| Fazekas 等 <sup>[7]</sup>     | 1.5-T MRI      | 8 (33) <sup>a</sup>  | 2 (14) |       | 偏头痛, n = 24; 对照组, n = 14 (平均 34 岁); 偏头痛与对照组间均在差异 ( $p < 0.01$ ); 偏头痛亚组间无差异; WMA 与年龄、发作频率及疾病持续时间无相关性                                     |
| Rovaris 等 <sup>[8]</sup>     | 1.5-T MRI      | 1 (25)               | 4 (33) | 0 (0) | MA, n = 4; MO, n = 12; 对照组, n = 17 (85% 为女性, 平均 35.1 岁); 未报道与偏头痛相关的变量                                                                   |
| Rocca 等 <sup>[9]</sup>       | 1.5-T MRI; DTI | 14 (40) <sup>a</sup> | 0 (0)  |       | MA, n = 6; MO, n = 28; 对照组, n = 17 (90% 为女性, 平均 35.6 岁); 偏头痛患者的正常脑组织的平均 MD 柱状图低于对照组 ( $p = 0.02$ ); 偏头痛与对照组间用柱状图度量的 FA 无差异; 未报道偏头痛有关的变量 |
| Degirmenci 等 <sup>[12]</sup> | 1.5-T MRI      | 5 (38)               | 0 (0)  | 1 (6) | MA, n = 13; MO, n = 9 (90% 为女性); 对照组, n = 18 (平均 35.7 岁); 偏头痛与对照组间均在差异 ( $p < 0.0001$ ); WMA 与发作频率、疾病持续时间无相关性; 偏头痛类型与发作频率、疾病持续时间无相关性    |

缩略语: FA = 各向异性分数; MA = 先兆偏头痛; MD = 平均弥散率; MO = 无先兆偏头痛; WMA 白质异常。

<sup>a</sup> 无明显区别的偏头痛 (MA 和 MO) 患者的汇总数据。

人群研究中 (表 2), 偏头痛患者脑改变的流行病学危险因素分析 1 (Cerebral Abnormalities in Migraine, an Epidemiological Risk Analysis 1, CAMERA-1) 是首个研究<sup>[10]</sup>。作者从偏头痛患者流行病学基因学分析<sup>[27]</sup>的研究人群中随机选取 295 例偏头痛患者及 140 例性别、年龄匹配的对照人群数据, 并分析了两组人群发生 WMA 的情况。研究发现在女性偏头痛人群中, 脑深部白质异常的发生率高于对照人群, 此关系与偏头痛是否伴有先兆无关, 而与偏头痛发生频率正相关 ( $p = 0.008$ ); 而男性人群中, 深部白质异常与偏头痛的发生、

亚型及发作频率无统计学相关性。在基于此对队列<sup>[11]</sup>人群的后续研究中, 作者发现高信号改变位于小脑及脑干, 尤其是背侧桥脑为著, 称为“幕下高信号灶” (IHL)。IHL 与幕上的 WMA 相关, 但与偏头痛的亚型、发作频率或小脑梗死无关。CAMERA-2<sup>[14]</sup>对患者进行了 9 年随访, 主要研究偏头痛发作频率与脑病灶进展的关联。该研究获得了 203 例 (203/295) 偏头痛组及 83 例 (83/140) 对照患者的影像资料。研究发现女性偏头痛患者, 尤其是 MO 患者, 发生深部 WMA 进展的概率高于对照组, 但与偏头痛的发作频率、持续时间、

**表 2 关于白质异常的以人群为基础的研究**

| 研究名称 (年)                        | 影像        | WMA 患者数 (%) |         |                                 | 偏头痛组与对照组的比例 (平均年龄, 岁); OR 和 p 值; 与偏头痛相关的变量的可能相关性                                                                                                                                                                                                                                                                                     |                                                                                                                                                                                                                                                                                                                                   |
|---------------------------------|-----------|-------------|---------|---------------------------------|--------------------------------------------------------------------------------------------------------------------------------------------------------------------------------------------------------------------------------------------------------------------------------------------------------------------------------------|-----------------------------------------------------------------------------------------------------------------------------------------------------------------------------------------------------------------------------------------------------------------------------------------------------------------------------------|
|                                 |           | MA          | MO      |                                 |                                                                                                                                                                                                                                                                                                                                      |                                                                                                                                                                                                                                                                                                                                   |
| CAMERA-1 <sup>[10]</sup> (2004) | 1.5-T MRI | 34 (21)     | 31 (23) | 22 (16)                         | MA, n = 161; MO, n = 134; 对照组, n = 140 (73% 为女性, 平均 48.3 岁); 呈现了深部 WMA 的数量 (%); 偏头痛与对照组相比: MA (OR 2.0; 95% CI 1.0~4.3) 和 MO (OR 2.1; 95% CI 1.0~4.7) vs 对照组 (OR 1.0) <sup>a</sup> ; WMA 与偏头痛亚型无关; WMA 与发作频率有关: $\leq 1$ 次/月 (OR 1.6; 95% CI 0.8~3.5) vs $\geq 1$ 次/月 (OR 2.6; 95% CI 1.2~5.7) ( $p = 0.008$ )。                       |                                                                                                                                                                                                                                                                                                                                   |
| CAMERA-1 <sup>[11]</sup> (2006) | 1.5-T MRI | 8 (5)       | 5 (4)   | 1 (1)                           | MA, n = 161; MO, n = 134; 对照组, n = 140 (73% 为女性, 平均 48.3 岁); 呈现了 IHL 的数量 (%); 偏头痛与 IHL 存在相关性 ( $p = 0.04$ ); IHL 与偏头痛亚型、发作频率、起病年龄或偏头痛治疗无关。                                                                                                                                                                                           |                                                                                                                                                                                                                                                                                                                                   |
| EVA-MRI <sup>[13]</sup> (2011)  | 1.0-T MRI | 10 (59)     | 38 (38) | 190 (31)                        | MA, n = 17; MO, n = 99; 非偏头痛, n = 47; 对照组, n = 617 (59% 为女性, 平均 69 岁); 呈现了深部 WMA 的数量 (%); 偏头痛、非偏头痛与对照组相比: MA (OR 12.4; 95% CI 1.6~99.4; $p = 0.005$ ), MO (OR 1.6; 95% CI 0.9~2.7; $p = 0.11$ )、非偏头痛 (OR 2.1; 95% CI 1.0~4.4; $p = 0.03$ ) vs 对照组 (OR 1.0); WMA 与严重头痛病史 ( $p = 0.002$ ) 存在相关性; WMA 与 MA ( $p = 0.005$ ) 有关; 未报道发作频率。 |                                                                                                                                                                                                                                                                                                                                   |
| CAMERA-2 <sup>[14]</sup> (2012) | 1.5-T MRI | 84 (74)     | 68 (76) | 54 (65) <sup>b</sup><br>11 (10) | 15 (17)                                                                                                                                                                                                                                                                                                                              | 2 (2) <sup>c</sup><br>MA, n = 114; MO, n = 89; 对照组, n = 83 (71% 为女性, 平均 57 岁)。呈现了 WMA <sup>a</sup> 与 IHL <sup>c</sup> 的数量; 偏头痛与对照组相比: WMA 进展 (OR 2.1; 95% CI 1.0~4.1; $p = 0.04$ ) <sup>ab</sup> ; 偏头痛与对照组相比: IHL 进展 (OR 7.7; 95% CI 1.0~59.5; $p = 0.05$ ) <sup>ac</sup> ; WMA 进展与发作频率、发作持续时间、发作类型及偏头痛治疗无关; IHL 进展与偏头痛亚型和发作频率无关。 |

缩略语: CAMERA = 偏头痛大脑异常, 一项流行病学风险分析; CI = 可信区间; EVA = 血管老化的流行病学; IHL = 幕下高信号病灶; MA = 先兆偏头痛; MO = 无先兆偏头痛; OR = 比值比; WMA = 白质异常。

<sup>a</sup> 女性偏头痛患者的结果。

<sup>b</sup> WMA 的结果。

<sup>c</sup> IHL 的结果。

严重程度及是否治疗无关。研究还发现 WMA 与认知功能的相关性无统计学意义 ( $p = 0.07$ )。此外,偏头痛患者并未表现出更加明显 IHL 进展的迹象。这些研究中所提及脑组织病变类型的危险因素均独立于心血管病危险因素之外<sup>[10,11,14]</sup>。

一项基于法国人群的横断面研究确证了偏头痛与 WMA 的关系<sup>[13]</sup>。该研究表明深部 WMA 与 MA 的相关性强于其与 MO 的相关性。但此关系并不仅限于偏头痛,也适用于非偏头痛类型的其他头痛,尤其是紧张型头痛。该研究发现非偏头痛患者年龄与 WMA 的相关性:大于 70 岁的患者其年龄与 WMA 相关 ( $p = 0.03$ )。简易精神状态检查未发现总体头痛状态、WMA 与认知功能障碍之间的相关性 ( $p = 0.17$ ),该试验并未研究头痛发作频率与 WMA 之间可能存在的相关性。

根据入选标准,4 项研究<sup>[8,10,12,13]</sup>符合本荟萃分析要求(表 1)。结果显示,与对照组相比,MA 与 WMA 具有相关性 ( $p = 0.03$ ) (图 e-1a),而 MO 则没有此种相关性 ( $p = 0.08$ ) (图 e-1b);另外,MA 及 MO 患者中 WMA 的发生率没有显著差异 ( $p = 0.71$ ) (图 e-1c)。各研究之间没有显著异质性,秩和相关检验未提示发表偏倚。

**脑梗死样损害的研究。**在 5 项关于 ILL 的人群研究中,有 3 项是基于 CAMERA 的人群队列(表 3);Kruit 等人<sup>[10,15]</sup>的研究报道发现与对照组及发作频率 >1 次/月的 MO 患者相比,发作频率 >1 次/月的 MA 患者,后循环血管支配区具有更高的 ILL 发生率。大多数 ILL 分布在小脑,而与幕上的 WMA 无相关性<sup>[15]</sup>。CAMERA-2<sup>[14]</sup>研究偏头痛患者 9 年间影像随访结果并未显示既往 ILL 病灶有进展迹象,也并不支持 ILL 与认知障碍之间的相关性 ( $p = 0.984$ )

Kruth<sup>[13]</sup>等人报道 ILL 仅在 MA 患者中风险性有所升高,且大多数病灶位于脑灰质深部,如皮质下及基底节区。但并未探究 ILL 与偏头痛发作频率之间的关系。

冰岛一项由 Scher 等人<sup>[16]</sup>进行的纵向随访研究调查了中年偏头痛与老年后其磁共振上所见的 ILL 的相关性。定义先兆为视觉障碍或麻木感。这项研究对观察对象进行了 26 年 MRI 随访,发现中年偏头痛患者年老时更易发生 ILL[比值比(odds ratio,OR) 1.4 95% 可信区间(confidence

interval,CI) 1.1~1.8]。而 MA 女性患者小脑发生 ILL 的概率升高了 2 成 ( $p = 0.04$ )。另一项独立的分析结果显示,以视觉障碍为先兆的女性 MA 患者,其小脑发生 ILL 的风险比感觉先兆的 MA 患者更高,而男性却没有此特征。年龄大于 50 岁的 MA 患者发生脑皮质梗死的风险也是轻微升高的 ( $p = 0.07$ )。MO 及非偏头痛的头痛患者发生 ILL 的风险并未增加。ILL 并不与心血管病的危险因素及颈动脉疾病或 TIA/脑卒中有明确相关性。

符合荟萃分析的标准的(表 2)共有 2 项<sup>[10,16]</sup>。MA 及 MO 分别与对照组相比,ILL 的发生情况并无统计学差异, $p$  值分别为 0.52(图 e-2a)及 0.08(图 e-2b)。而与 MO 患者相比,MA 患者更易出现 ILL ( $p = 0.04$ ) (图 e-2c)。关于 ILL 的研究之间并没有异质性。由于只有 2 项研究符合要求,秩和相关检验无法进行(至少需要 3 项)。

**脑组织体积改变的研究。**我们共选定了 9 项通过 VBM 及 DTI 评估偏头痛患者及对照组脑组织体积的临床研究(表 e-1)<sup>[17-24,28]</sup>。其中 7 项临床研究<sup>[17,19-24]</sup>的结果显示偏头痛患者脑灰质密度较对照组减低。此外,有 1 项研究<sup>[17]</sup>的结果显示偏头痛患者导水管周围灰质及桥脑背外侧的密度较对照组更高,但仅出现在 MA 患者中。有 5 项研究的结果显示 MA 的发作频率<sup>[20-22]</sup>及持续时间<sup>[17,21,22,24]</sup>与偏头痛患者额<sup>[17,20-22,24]</sup>、颞<sup>[17,20]</sup>、顶叶<sup>[20-22]</sup>、扣带回<sup>[20,21,24]</sup>、脑干<sup>[20,24]</sup>、小脑<sup>[20,24]</sup>及边缘系统<sup>[20-22]</sup>灰质减少有相关性。有 1 项研究<sup>[20]</sup>报道,与阵发性偏头痛(每月头痛天数  $\leq 15$  天)相比,慢性偏头痛患者(每月头痛天数  $\geq 15$  天)存在多个主要位于扣带回前(anterior cingulate cortex,ACC)及其他多个区域脑组织体积的减少。提示偏头痛发作频率与灰质减少之间存在关联,尤其是在扣带回前。

**讨论** 以上的结果提示偏头痛是 WMA、ILL 和脑组织体积改变的危险因素。但上述影像学异常与偏头痛亚型、病情轻重程度之间的关联并不清楚。下面予以讨论。

**脑白质病变。**入选的研究项目中,偏头痛患者并发 WMA 的比率为 4%~59%(表 1 和 2);其临床意义目前尚不清楚。WMA 的病理改变可见胶质增



**表 3 无症状脑梗死样病灶的以人群为基础的研究**

| 研究名称 (年)                                   | 影像        | ILL 数量 (%)           |         |          | 偏头痛组与对照组的比例 (平均年龄, 岁); OR 和 p 值; 与偏头痛相关的变量的可能相关性                                                                                                                                                                                                                                                      |
|--------------------------------------------|-----------|----------------------|---------|----------|-------------------------------------------------------------------------------------------------------------------------------------------------------------------------------------------------------------------------------------------------------------------------------------------------------|
|                                            |           | MA                   | MO      |          |                                                                                                                                                                                                                                                                                                       |
| CAMERA-1 <sup>[10,15]</sup><br>(2004-2005) | 1.5-T MRI | 13 (8)               | 3 (2)   | 1 (1)    | MA, n = 161; MO, n = 134; 对照组, n = 140 (73% 为女性; 平均 48.3 岁); 呈现了 PCT ILL 的数量 (%); 偏头痛与对照组相比: MA (OR 213.7; 95% CI 1.7~112) 和 MO (OR 2.3; 95% CI 0.2~23) vs 对照组 (OR 1.0); PCT ILL 与 MA 有关 (p = 0.03); ILL 与发作频率有关: ≤ 1 次 / 月 (OR 5.1; 95% CI 0.6~44) vs ≥ 1 次 / 月 (OR 9.3; 95% CI 1.1~76) (p < 0.005)。 |
| AGES-RS <sup>[16]</sup> (2009)             | 1.5-T MRI | 80 (22)              | 29 (14) | 579 (18) | MA, n = 361; MO, n = 209; 非偏头痛的偏头痛, n = 876; 对照组, n = 3,243 (57% 为女性, 中年的平均年龄为 50.9 岁; 晚年的平均年龄 76.2 岁); 呈现了小脑 IHL 的数量 (%); 偏头痛与对照组相比: MA (OR 2.0; 95% CI 1.4~2.7)、MO (OR 1.1; 95% CI 0.7~1.8) vs 对照组 (OR 1.0) <sup>a</sup> ; 小脑 ILL 与 MA 的相关性与性别存在交互作用 (p = 0.04); 未报道发病频率与疾病持续时间。                    |
| EVA-MRI <sup>[13]</sup> (2011)             | 1.0-T MRI | 17 (15) <sup>b</sup> |         | 89 (15)  | MA, n = 17; MO, n = 99; 非偏头痛, n = 47; 对照组, n = 617 (59% 为女性, 平均 69 岁); 呈现了存在 ILL 的患者数量 (%); 偏头痛与 MO 和对照组相比: MA (OR 3.4; 95% CI 1.2~9.3) vs MO 和对照组 (OR 1.0); ILL 与 MA 有关, p 值不可用; 未报道发作频率。                                                                                                            |
| CAMERA-2 <sup>[14]</sup> (2012)            | 1.5-T MRI | 5 (4)                | 5 (6)   | 0 (0)    | MA, n = 114; MO, n = 89; 对照组, n = 83 (71% 为女性, 平均 57 岁); 呈现了新 PCT ILL 的数量 (%); 偏头痛与新 ILL 无相关性 (p = 0.07)                                                                                                                                                                                              |

缩略语: AGES-RS = 年龄、基因 / 环境易感性 -Reykjavik 研究; CAMERA = 偏头痛大脑异常, 一项流行病学风险分析; CI = 可信区间; EVA = 血管老化的流行病学; ILL = 脑梗死样病灶; MA = 先兆偏头痛; MO = 无先兆偏头痛; OR = 比值比; PCT = 后循环区域。

<sup>a</sup> 女性偏头痛患者和小脑 ILL 的 OR。

<sup>b</sup> 偏头痛组与对照组无明显区别的汇总数据。

生, 脱髓鞘及轴突损失<sup>[29]</sup>, 这些损害可能都是脑小血管病变造成的, 而偏头痛患者可能也有相同的病理基础<sup>[29,30]</sup>。

有的研究结果提示 WMA 在偏头痛患者人群中更多见, 但是众多研究的结论并非完全一致。偏头痛亚型、发作频率及症状持续时间与 WMA 之间的关系相当重要。CAMERA-1<sup>[10]</sup> 研究了偏头痛发作频率与 WMA 之间的关系, 作者认为, 偏头痛发作时, 局部脑血管反复缺血的累积效应可能会造成 WMA 的进展。意大利的一项纵向研究<sup>[31]</sup> 对 MA 患者的 MRI 表现进行了 33 个月的随访, 证明 MA 患者 WMA 有进展表现; 但因为该试验缺乏非偏头痛对照组而并未被纳入本研究分析中; 此研究结论显示新发 WMA 数目与 MA 发作频率 (p = 0.03) 及先兆持续时间 (p < 0.0001) 均存在相关性。CAMERA-2 研究<sup>[14]</sup> 显示 WMA 在女性 MO 患者中更多见, 与偏头痛发作频率及持续时间无相关性, 此结论对“WMA 反映了进展性脑缺血改变”这一观点提出质疑。CAMERA-1 研究<sup>[10]</sup> 中患者偏头痛发作次数的中位数为 11.05 次 / 年, CAMERA-2<sup>[14]</sup> 并未报道发作次数相关数值。CANREA-2 未发现发作频率与 WMA 之间的关联可能是由于研究人群偏头痛发作频率较低及样本量较小造成。与 CAMERA 相比, Kruth<sup>[13]</sup> 等人发现 WMA 与 MA 之间的相关性, 但与 CAMERA 相反, 该作者并未分析 WMA 与偏头痛发作频率之间的相关性。

WMA 并非偏头痛患者 MRI 的特征表现, 有证据证实年龄及其他类型头痛人群中均可见到此种改变<sup>[13]</sup>。虽然之前有报道称 WMAs 与心血管病危险因素之间存在相关性<sup>[32,33]</sup>, 但本文所纳入的人群研究<sup>[10,11,13,14]</sup> 中, 偏头痛患者发生 WMA 是独立于心血管病危险因素之外的。WMA 的发生也被认为存在数种医疗性危险因素。并发亚临床甲状腺功能亢进或减退及高同型半胱氨酸血症的偏头痛患者 WMA 的发生率也较高<sup>[34]</sup>。卵圆孔未闭<sup>[35]</sup> 和二尖瓣脱垂<sup>[36]</sup> 也可能增加 WMA 发生的风险。在某些病例中, WMA 的数量、分布情况及存在的位置能够诊断潜在的疾病, 而偏头痛只是该疾病的继发表现, 如伴皮质下梗死及白质脑病常染色体显性遗传性脑动脉病<sup>[37]</sup>、线粒体肌病、线粒体脑病、乳酸酸中毒及卒中样发作<sup>[38]</sup> 或多发性硬化<sup>[39]</sup>。一项纳入了 185 例 MA 患者的研究评估了 WMA 分布位置与偏头痛先兆症状之间的相关性, 发现先兆形式并不会影响 WMA 的分布情况<sup>[40]</sup>。

近期 Rist 等人<sup>[41]</sup> 进行的一项前瞻性研究发现偏头痛患者认知改变与 WMA 并不存在关联, 这与 Kruth<sup>[13]</sup> 等人及 CAMERA-2<sup>[14]</sup> 中的结论一致。另外, 研究发现 WMA 的体积<sup>[42]</sup> 与卒中发生的风险正相关。而 CAMERA-2 研究中<sup>[14]</sup> 将 WMA 视为与偏头痛相关的一种良性影像学改变, 其临床参考意义仍待更多研究证实。

最后, CAMERA-2<sup>[14]</sup> 并未发现 WMA 的发展与偏头痛治疗之间存在关联。一项观察性研究<sup>[43]</sup>

表明曲普坦类药物的应用并未增加脑梗死、心肌梗死或心血管致死事件的风险。但由于指示性混杂的影响，该结论虽然可靠，但缺乏力度。也就是说，因为使用曲普坦药物的患者可能因为心血管疾病危险因素较少而抵消了该药物理论上可能存在的心血管疾病风险。

关于 WMA 的荟萃分析支持 MA 患者 WMA 风险增加的理论假设<sup>[8,10,12,13]</sup>。所有 4 项研究所得出的 OR 值均大于 1，整体 OR 值为 1.68。而 MO 并不是 WMA 的危险因素。然而，关于 WMA 的进展是否与偏头痛的累积效应相关仍需进一步的研究证明。

**无症状性梗死样损害。**无症状 ILL 可在偏头痛患者的磁共振检查中见到，病灶倾向分布于小脑<sup>[10,15,16]</sup>及灰质深部（表 3）<sup>[13]</sup>。频繁发作<sup>[10,15]</sup>的先兆偏头痛与无症状 ILL 相关性最强。Scher 等人<sup>[16]</sup>报道，中年女性偏头痛患者年老后小脑发生 ILL 风险升高 2 成。这项研究对偏头痛先兆的定义相对宽泛，其中可能有一部分患者并不符合 ICHD 对于先兆的界定标准，可能会减弱先兆与 ILL 之间已测量的相关性。但此项研究的结果仍被认为是有效的。该研究所得出的中年女性 MA 患者与老年时小脑发生 ILL 相关联的特异性不能用偏头痛先兆的误分类来解释，因为这只会降低这种特异性。

CAMERA-2 研究<sup>[14]</sup>仅表明偏头痛患者有 ILL 新发及进展的趋势，这可能是由于缺乏效力。ILL 与脑梗死的发生或进展的关系尚不清楚。CAMERA-2 报道发生 ILL 的偏头痛患者与无 ILL 的偏头痛患者比具有更多的心血管病危险因素，临床脑卒中<sup>[14]</sup>的诊断率也更高。作者认为 ILL 的发生可能是脑组织反复低灌注及栓塞<sup>[15]</sup>共同造成的。有研究表明高血压与 ILL 密切相关，提示 ILL 可能是高血压所致脑小血管病的表现形式<sup>[44,45]</sup>。

Kruit 等人<sup>[10,15]</sup>及 Scher 等人<sup>[16]</sup>均发现绝大多数 ILL 位于小脑，而相比之下，Kruth<sup>[13]</sup>等人则发现大多数 ILL 病灶位于皮质下及基底节区。即使磁共振上诊断 ILL 有明确的标准，但对于 ILL 的解释仍存在争议。Kruth 及 Tzourio<sup>[46]</sup>认为该标准可能无法诊断位于小脑上的病灶。该作者认为在 MRI 上区分 ILL 及扩大的血管周围间隙（如 Virchow-Robin 间隙）是非常困难的，且有的病灶属于其他性质或其实就是脑内正常结构的表现。有证据显示，无症状性偏头痛患者存在轻微的小

脑功能障碍，表明 ILL 对脑功能有一定的影响<sup>[47]</sup>。如果这些 ILL 是脑梗死灶，那么偏头痛对脑结构及功能造成的长期危害将令人担忧。

有研究称 ILL 会增加老年患者认知障碍及痴呆的风险<sup>[48]</sup>，但 Rist 等人<sup>[41]</sup>并未发现偏头痛或其他类型的严重头痛与认知障碍存在关联，这与 Kruth<sup>[13]</sup>及 CAMERA-2<sup>[14]</sup>的研究结果相契合。

关于 ILL 的荟萃分析难以解释，部分原因是因为仅纳入了 2 项研究。Kruit 等人<sup>[10]</sup>的研究表明，与对照组相比，ILL 与偏头痛之间存在相关性，但 Scher 等人<sup>[16]</sup>的研究结果并不支持这种联系。对于 MO，Kruit 等人<sup>[10]</sup>的研究并未发现与 ILL 存在关联，而 Scher 等人<sup>[16]</sup>发现 MO 对 ILL 有不显著的延缓作用。与 MO 相比，MA 患者发生 ILLs 的 OR 值相对较高。

**脑实质体积的改变。**有 7 项临床研究显示偏头痛患者脑内存在体积改变的好发部位（表 e-1），体积缩小的区域包括双侧岛叶、额叶、前额叶、颞叶、顶叶、枕叶、前扣带回、基底节及小脑<sup>[17-24]</sup>；体积增大的区域包括背侧脑桥及导水管周围灰质<sup>[17]</sup>。Schmidt-Wilcke 等人<sup>[49]</sup>通过研究慢性紧张型头痛发现患者脑内存在前扣带回、颞叶、额眶回及小脑皮质体积的减小，提示脑组织体积改变不仅只在偏头痛患者中发生，紧张性头痛患者也可发生。Rocca<sup>[17]</sup>等人发现偏头痛患者导水管周围灰质密度增大，而该区域被认为与疼痛觉处理相关。偏头痛患者导水管周围灰质及深部核团如红核、壳核及尾状核存在铁代谢异常。作者认为这些部位铁元素的沉积体现了偏头痛复发所造成的进展性神经细胞损害<sup>[50,51]</sup>。

脑实质体积的改变可能是偏头痛反复发作造成的并发症，但此假设仍需进一步研究证实，其临床意义也不明确。

**方法学评价及疑虑。**关于偏头痛对脑组织结构改变的影响，临床研究及人群研究提供了互为补充的观点，但推导关于二者之间关系的结论时仍需谨慎。解释偏头痛患者磁共振所见的脑内结构改变是很困难的，其理由将在后文解释。首先评价上述研究共有的优点及局限性，然后分别分析临床研究及人群研究各自的特征。

所有影像学研究都应分析研究对象的异质性，

因为偏头痛自身是一类异质性疾病。上文提及的研究在样本量、入组标准（年龄、性别、血管病危险因素、抗偏头痛治疗）、头痛特征（偏头痛亚型、发作频率、持续时间）、试验方法学、持续时间和数据分析等方面都有众多不同之处。即使作者都计算并校正了潜在的混杂因素，特别是大样本量的人群研究中，但不恰当的测量或未测量的混淆还是可能存在的。大多数临床和人群研究是横断面的，描述了偏头痛与脑结构改变之间的关系，但并没有说明二者关系的方向性。理论上讲，偏头痛患者某些脑结构的改变可能是由于其他疾病或治疗造成的，而另一些改变可能反映了其对偏头痛的易损性。

临床研究的纳入对象都具有专科治疗背景，可能导致以下问题：首先，因为接受专业治疗的患者只是偏头痛患者中的少数，此样本可能并不能代表众多偏头痛患者的实际情况；这些患者发病可能更频繁、更严重、具有更多伴发疾病且就诊治疗率更高。另外，临床研究的非偏头痛对照组选择也是相对困难的，因为临床诊疗中心具有广泛且差异巨大的可供参考的人群。若人群研究发现某些 MRI 上的改变与疾病发作的频率与程度相关，临床研究则是证实该结论的最佳方法。

人群研究可以最大程度上减小转诊偏倚，且对照组的选择相对容易。由于人群研究不可能让人群的参与率达到 100%，所以选择偏倚是无法避免的。若研究选择 50 岁以上人群，既往偏头痛的患者可能因为症状的缓解而没有入组，造成发病率较实际低的现象，而这部分人群可能会被纳入到对照组中，削弱了试验组与对照组的差异性，可能导致阴性的研究结果。人群研究规避了选择偏倚和转诊偏倚且容易被归纳。若病情相对轻微的患者纳入较多，发现偏头痛发作频率及严重程度与脑结构病变之间的关系将更加困难。

**结论及展望。**这篇综述表明偏头痛可能是造成脑结构改变的危险因素。与非偏头痛的对照组相比，偏头痛患者更多发生 WMA、ILL 及脑灰、白质体积改变。而上述脑结构改变与偏头痛发作频率及持续时间的相关性尚不清晰。目前看来，上述三种脑组织病变的对脑组织功能的影响及临床意义也不明确。美国神经学学会及美国头痛联盟<sup>[52]</sup>的指南并未提到偏头痛患者需常规头 MRI 检查；仅

推荐头痛不典型、头痛性质近期发生改变、出现其他症状（如癫痫）或伴随神经局灶症状或体征的患者行 MRI 检查。

出现 MWA 的偏头痛患者无需特殊处理，而发现 ILL 的患者应筛查缺血性脑血管病危险因素并予以处置，体积定量磁共振仍然处于研究阶段。

为进一步增进对此课题的认识，更多纵向的研究应广泛纳入疾病发作频率及严重程度，以充分了解偏头痛与上述脑结构改变的关系，并进一步阐明此三种磁共振所见结构异常与发作频率及症状持续时间的相关性，及这些损伤对脑功能和预后的影响。

## 作者贡献

Dr. Bashir and Dr. M. Ashina conceived and designed (including search strategies) the review. Dr. Bashir did the literature search and wrote the first and subsequent drafts of the manuscript. Dr. S. Ashina conducted the meta-analysis. Dr. Lipton, Dr. S. Ashina, and Dr. M. Ashina participated in critical revision and writing of the article. All authors have seen and approved the final version.

## 研究基金

Supported by the Lundbeck Foundation and the Novo Nordisk Foundation.

## 声明

A. Bashir reports no disclosures. R. Lipton receives research support from the NIH [PO1 AG03949 (Program Director), RO1AG025119 (Investigator), RO1AG022374-06A2 (Investigator), RO1AG034119 (Investigator), RO1AG12101 (Investigator), K23AG030857 (Mentor), K23NS05140901A1 (Mentor), and K23NS47256 (Mentor)], the National Headache Foundation, and the Migraine Research Fund; serves on the editorial board of *Neurology*<sup>®</sup>; has reviewed for the NIA and NINDS; holds stock options in eNeura Therapeutics; and serves as consultant, advisory board member, or has received honoraria from Allergan, American Headache Society, Autonomic Technologies, Boston Scientific, Bristol Myers Squibb, Cognimed, Colucid, Eli Lilly, eNeura Therapeutics, GlaxoSmithKline, MAP, Merck, Nautilus Neuroscience, Novartis, NuPathe, Pfizer, and Vedanta. Dr. S. Ashina received honoraria for lecturing from Allergan and Neurogesx and is a consultant for Depomed. Dr. M. Ashina is an associate editor of *Cephalalgia* and is a consultant or scientific adviser for Autonomic Technologies, Inc., Allergan, Amgen, and Alder. Go to [Neurology.org](http://Neurology.org) for full disclosures.

Received January 9, 2013. Accepted in final form July 1, 2013.

## 参考文献

1. Headache Classification Subcommittee of the International Headache Society. The International Classification of Headache Disorders, 2nd ed. Cephalalgia 2004;24 (suppl 1):1–151.
2. Rasmussen BK, Jensen R, Schroll M, Olesen J. Epidemiology of headache in a general population: a prevalence study. J Clin Epidemiol 1991;44:1147–1157.
3. Lipton RB, Stewart WF, Diamond S, Diamond ML, Reed M. Prevalence and burden of migraine in the United States: data from the American Migraine Study II. Headache 2001;41:646–657.
4. Lyngberg AC, Rasmussen BK, Jørgensen T, Jensen R. Secular changes in health care utilization and work absence for migraine and tension-type headache: a population based study. Eur J Epidemiol 2005;20:1007–1014.



5. IMS Audit, January 1999. Available at: [http://www.americanheadachesociety.org/assets/1/7/NAP\\_for\\_Web\\_-\\_Epidemiology\\_\\_\\_Impact\\_of\\_Headache\\_\\_\\_Migraine.pdf](http://www.americanheadachesociety.org/assets/1/7/NAP_for_Web_-_Epidemiology___Impact_of_Headache___Migraine.pdf). Accessed January 5, 2013.
6. Moschiano F, D'Amico D, Di Stefano M, Rocca N, Bussone G. The role of the clinician in interpreting conventional neuroimaging findings in migraine patients. *Neurol Sci* 2007;28:S114–S117.
7. Fazekas F, Koch M, Schmidt R, et al. The prevalence of cerebral damage varies with migraine type: an MRI study. *Headache* 1992;32:287–291.
8. Rovaris M, Bozzali M, Rocca MA, Colombo B, Filippi M. An MR study of tissue damage in the cervical cord of patients with migraine. *J Neurol Sci* 2001;183:43–46.
9. Rocca MA, Colombo B, Inglese M, Codella M, Comi G, Filippi M. A diffusion tensor magnetic resonance imaging study of brain tissue from patients with migraine. *J Neurol Neurosurg Psychiatry* 2003;74:501–503.
10. Kruit MC, van Buchem MA, Hofman PA, et al. Migraine as a risk factor for subclinical brain lesions. *JAMA* 2004;291:427–434.
11. Kruit MC, Launer LJ, Ferrari MD, van Buchem MA. Brain Stem and cerebellar hyperintense lesions in migraine. *Stroke* 2006;37:1109–1112.
12. Degirmenci B, Yaman M, Haktanir A, Albayrak R, Acar M. Cerebral and cerebellar ADC values during a migraine attack. *Neuroradiology* 2007;49:419–426.
13. Kurth T, Mohamed S, Maillard P, et al. Headache, migraine, and structural brain lesions and function: population based Epidemiology of Vascular Ageing-MRI study. *BMJ* 2011;342:c7357.
14. Palm-Meinders IH, Koppen H, Terwindt GM, et al. Structural brain changes in migraine. *JAMA* 2012;308:1889–1897.
15. Kruit MC, Launer LJ, Ferrari MD, van Buchem MA. Infarcts in the posterior circulation territory in migraine: the population-based MRI CAMERA study. *Brain* 2005;128:2068–2077.
16. Scher AI, Gudmundsson LS, Sigurdsson S, et al. Migraine headache in middle age and late-life brain infarcts. *JAMA* 2009;301:2563–2570.
17. Rocca MA, Ceccarelli A, Falini A, et al. Brain gray matter changes in migraine patients with T2-visible lesions: a 3-T MRI study. *Stroke* 2006;37:1765–1770.
18. Dasilva AFM, Granziera C, Tuch DS, Snyder J, Vincent M, Hadjikhani N. Intercal alterations of the trigeminal somatosensory pathway and periaqueductal gray matter in migraine. *Neuroreport* 2007;18:301–305.
19. Schmidt-Wilcke T, Gänßbauer S, Neuner T, Bogdahn U, May A. Subtle grey matter changes between migraine patients and healthy controls. *Cephalalgia* 2008;28:1–4.
20. Valfré W, Rainero I, Bergui M, Pinessi L. Voxel-based morphometry reveals gray matter abnormalities in migraine. *Headache* 2008;48:109–117.
21. Kim JH, Suh SI, Seol HY, et al. Regional grey matter changes in patients with migraine: a voxel-based morphometry study. *Cephalalgia* 2008;28:598–604.
22. Schmitz N, Admiraal-Behloul F, Arkink EB, et al. Attack frequency and disease duration as indicators for brain damage in migraine. *Headache* 2008;48:1044–1055.
23. Schmitz N, Arkink EB, Mulder M, et al. Frontal lobe structure and executive function in migraine patients. *Neurosci Lett* 2008;440:92–96.
24. Jin C, Yuan K, Zhao L, et al. Structural and functional abnormalities in migraine patients without aura. *NMR Biomed* 2013;26:58–64.
25. Lipton RB, Pan J. Is migraine a progressive brain disease? *JAMA* 2004;291:493–494.
26. Lipton RB. Tracing transformation: chronic migraine classification, progression, and epidemiology. *Neurology* 2009;72(suppl 1):S3–S7.
27. Launer LJ, Terwindt GM, Ferrari MD. The prevalence and characteristics of migraine in a population-based cohort: the GEM study. *Neurology* 1999;53:537–542.
28. Matharu MS, Good CD, May A, Bahra A, Goadsby PJ. No change in the structure of the brain in migraine: a voxel-based morphometric study. *Eur J Neurol* 2003;10:53–57.
29. Fazekas F, Kleinert R, Offenbacher H, et al. Pathologic correlates of incidental MRI white matter signal hyperintensities. *Neurology* 1993;43:1683–1689.
30. Young VG, Halliday GM, Kril JJ. Neuropathologic correlates of white matter hyperintensities. *Neurology* 2008;71:804–811.
31. Dinia L, Bonzano L, Albano B, et al. White matter lesions progression in migraine with aura: a clinical and MRI longitudinal study. *J Neuroimaging* 2013;23:47–52.
32. Jefferson AL, Tate DF, Poppas A, et al. Lower cardiac output is associated with greater white matter hyperintensities in older adults with cardiovascular disease. *J Am Geriatr Soc* 2007;55:1044–1048.
33. Shrestha I, Takahashi T, Nomura E, et al. Association between central systolic blood pressure, white matter lesions in cerebral MRI and carotid atherosclerosis. *Hypertens Res* 2009;32:869–874.
34. Trauninger A, Leél-Össy E, Kamson DO, et al. Risk factors of migraine-related brain white matter hyperintensities: an investigation of 186 patients. *J Headache Pain* 2011;12:97–103.
35. Ueno Y, Shimada Y, Tanaka R, et al. Patent foramen ovale with atrial septal aneurysm may contribute to white matter lesions in stroke patients. *Cerebrovasc Dis* 2010;30:15–22.
36. Spence JD, Wong DG, Melendez LJ, Nichol PM, Brown JD. Increased prevalence of mitral valve prolapsed in patients with migraine. *Can Med Assoc J* 1984;131:1457–1460.
37. Vahedi K, Chabriat H, Levy C, Joutel A, Tournier-Lasserre E, Bousser MG. Migraine with aura and brain magnetic resonance imaging abnormalities in patients with CADASIL. *Arch Neurol* 2004;61:1237–1240.
38. Hirano M, Ricci E, Koenigsberger MR, et al. MELAS: an original case and clinical criteria for diagnosis. *Neuromuscul Disord* 1992;2:125–135.
39. Filippi M, Rocca MA, De Stefano N, et al. Magnetic resonance techniques in multiple sclerosis. *Arch Neurol* 2011;68:1514–1520.
40. Rossato G, Adami A, Thijs VN, et al. Cerebral distribution of white matter lesions in migraine with aura patients. *Cephalalgia* 2010;30:855–859.
41. Rist PM, Dufouil C, Glymour MM, Tzourio C, Kurth T. Migraine and cognitive decline in the population-based EVA study. *Cephalalgia* 2011;31:1291–1300.
42. Buyck JF, Dufouil C, Mazoyer B, et al. Cerebral white matter lesions are associated with the risk of stroke but not with other vascular events: The 3-City Dijon study. *Stroke* 2009;40:2327–2331.
43. Hall GC, Brown MM, Mo J, MacRae KD. Triptans in migraine: the risks of stroke, cardiovascular disease, and death in practice. *Neurology* 2004;62:563–568.
44. Vermeer SE, Koudstaal PJ, Oudkerk M, Hofman A, Breteler MMB. Prevalence and risk factors of silent brain



- infarcts in the population-based Rotterdam Scan study. *Stroke* 2002;33:21–25.
45. Vermeer SE, Longstreth WT Jr, Koudstaal PJ. Silent brain infarcts: a systematic review. *Lancet Neurol* 2007;6:611–619.
  46. Kurth T, Tzourio C. Migraine and cerebral infarct-like lesions on MRI: an observation, not a disease. *JAMA* 2009;301:2594–2595.
  47. Sándor PS, Mascia A, Seidel L, de Pasqua V, Schoenen J. Subclinical cerebellar impairment in the common types of migraine: a three-dimensional analysis of reaching movements. *Ann Neurol*. 2001;49:668–672.
  48. Vermeer SE, Prins ND, den Heijer T, Hofman A, Koudstaal PJ, Breteler MMB. Silent brain infarcts and the risk of dementia and cognitive decline. *N Engl J Med* 2003;348:1215–1222.
  49. Schmidt-Wilcke T, Leinisch E, Straube A, et al. Gray matter decrease in patients with chronic tension type headache. *Neurology* 2005;65:1483–1486.
  50. Welch KMA, Nagesh V, Aurora SK, Gelman N. Periaqueductal gray matter dysfunction in migraine: cause or the burden of illness? *Headache* 2001;41:629–637.
  51. Kruit MC, Launer LJ, Overbosch J, van Buchem MA, Ferrari MD. Iron accumulation in deep brain nuclei in migraine: a population-based magnetic resonance imaging study. *Cephalalgia* 2008;29:351–359.
  52. Guidelines from the American Academy of Neurology and US Headache Consortium: neuroimaging in patients with nonacute headache. Available at: <http://tools.aan.com/professionals/practice/pdfs/gl0088.pdf>. Accessed November 28, 2011.

(王超译 杨弋审校)
